# Supplementary material for: Non-transient thermo-/photochromism of iodobismuthate hybrids directed by solvated metal cations
Source: Royal Society of Chemistry journal article supplement (doi:10.1039/c9dt04818a), 2020-01-01
Supplement: c9dt04818a2.pdf [file c9dt04818a2.pdf]

Electronic Supplementary Material (ESI) for Dalton Transactions.

This journal is © The Royal Society of Chemistry 2019

# Non-transient Thermo-/Photochromism of Iodobismuthate Hybrids Directed by Solvated Metal Cations

*Electronic Supplementary Information*

Pengfei Hao\*, Weipin Wang, Junju Shen, Yunlong Fu\*

*Key Laboratory of Magnetic Molecules & Magnetic Information Materials Ministry of  
Education, School of Chemical and Material Science, Shanxi Normal University,  
Linfen 041004, China*

## Content

|                                                                                                                                                                         |   |
|-------------------------------------------------------------------------------------------------------------------------------------------------------------------------|---|
| <b>1. Figures</b> .....                                                                                                                                                 | 3 |
| <b>Fig. S1</b> IR spectra of <b>1</b> and <b>2</b> .....                                                                                                                | 3 |
| <b>Fig. S2</b> The SEM images and EDS pattern of <b>1</b> . ....                                                                                                        | 3 |
| <b>Fig. S3</b> The SEM images and EDS pattern of <b>2</b> . ....                                                                                                        | 3 |
| <b>Fig. S4</b> The asymmetric unit of <b>1</b> and <b>2</b> (M = La ( <b>1</b> ), Bi ( <b>2</b> )). ....                                                                | 4 |
| <b>Fig. S5</b> TG-DSC curve of <b>1</b> .....                                                                                                                           | 4 |
| <b>Fig. S6</b> TG-DSC curve of <b>2</b> .....                                                                                                                           | 4 |
| <b>Fig. S7</b> The comparison of UV-vis absorption spectra for <b>1</b> and <b>2</b> . ....                                                                             | 5 |
| <b>Fig. S8</b> The comparison of energy gaps for <b>1</b> and <b>2</b> . ....                                                                                           | 5 |
| <b>Fig. S9</b> UV-vis absorption spectra of <b>1</b> before and after light illumination. ....                                                                          | 6 |
| <b>Fig. S10</b> Temperature-dependent UV-vis absorption spectra of <b>2</b> heated at the temperature<br>range of 25-50°C for 15 min. ....                              | 6 |
| <b>Fig. S11</b> Time-dependent UV-vis absorption spectra and photographs for the thermo-<br>induced coloration process of <b>2</b> . ....                               | 6 |
| <b>Fig. S12</b> The comparison of UV-vis absorption spectra of <b>2</b> , <b>2H-1</b> -decolorized, <b>2H-2</b> -<br>decolorized and <b>2P</b> -decolorized. ....       | 7 |
| <b>Fig. S13</b> The switching cycles of coloration-decoloration processes of <b>2</b> upon alternating<br>thermal (60°C) and dark treatment. ....                       | 7 |
| <b>Fig. S14</b> The switching cycles of coloration-decoloration processes of <b>2</b> upon alternating<br>thermal treatment (140°C) and exposing in the DMSO vapor..... | 7 |
| <b>Fig. S15</b> TG-DSC curve of <b>2H-1</b> .....                                                                                                                       | 8 |
| <b>Fig. S16</b> TG-DSC curve of <b>2H-2</b> .....                                                                                                                       | 8 |
| <b>Fig. S17</b> The comparison of PXRD patterns of <b>2</b> , <b>2H-1</b> -decolorized, <b>2H-2</b> -decolorized and <b>2P</b> -<br>decolorized. ....                   | 8 |
| <b>Fig. S18</b> The switching cycles of coloration-decoloration processes of <b>2</b> upon UV light                                                                     |   |

|                                                                                                                                   |    |
|-----------------------------------------------------------------------------------------------------------------------------------|----|
| irradiation and dark treatment .....                                                                                              | 9  |
| <b>2. Tables</b> .....                                                                                                            | 10 |
| <b>Table S1</b> Crystallographic data and refinement parameters of compounds <b>1</b> and <b>2</b> . ....                         | 10 |
| <b>Table S2</b> Selected bond lengths (Å) and angles (°) for <b>1</b> and <b>2</b> . ....                                         | 11 |
| <b>Table S3</b> The relative stability of solvated metal cations in <b>1</b> and <b>2</b> based on DFT calculation.<br>.....      | 13 |
| <b>Table S4</b> The band gap (E <sub>g</sub> ) of <b>2</b> with the decrease of I···I distance based on DFT calculation.<br>..... | 13 |

# 1. Figures

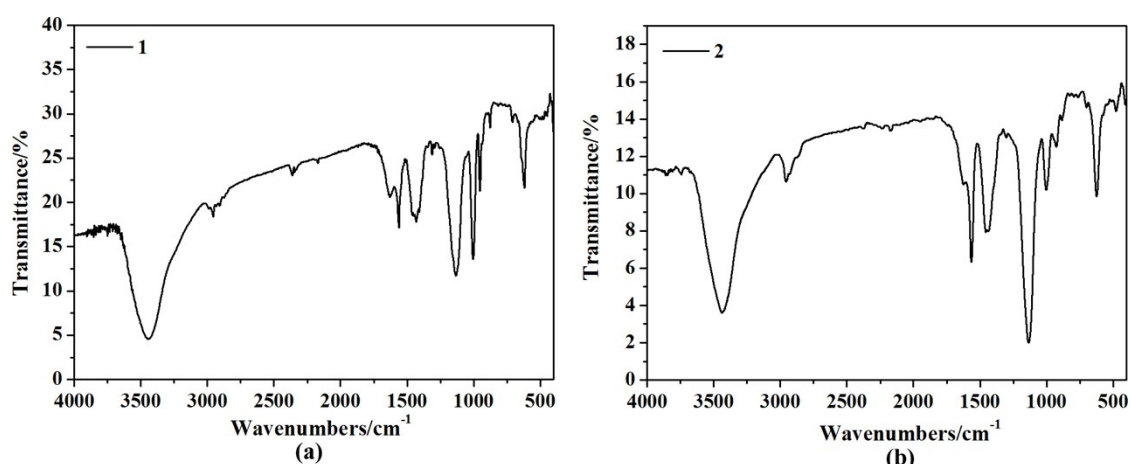

Fig. S1 IR spectra of 1 and 2.

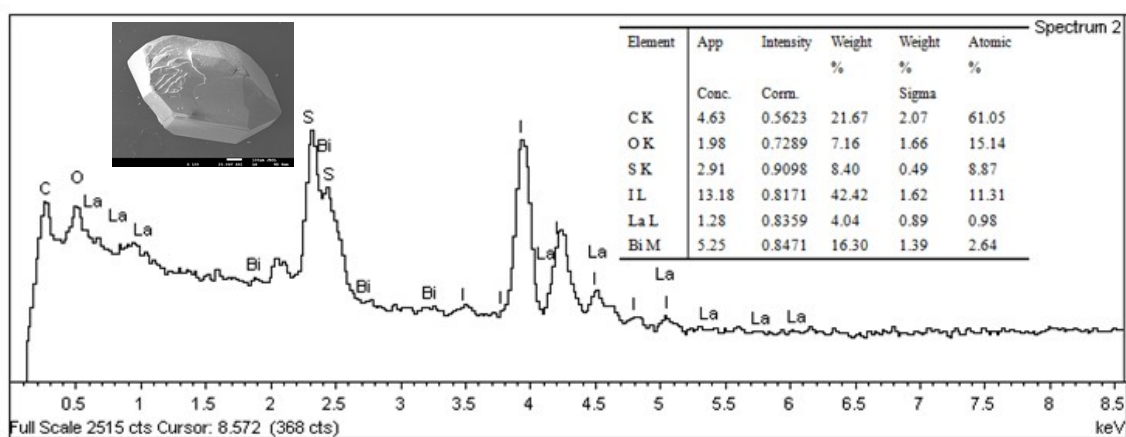

Fig. S2 The SEM images and EDS pattern of 1.

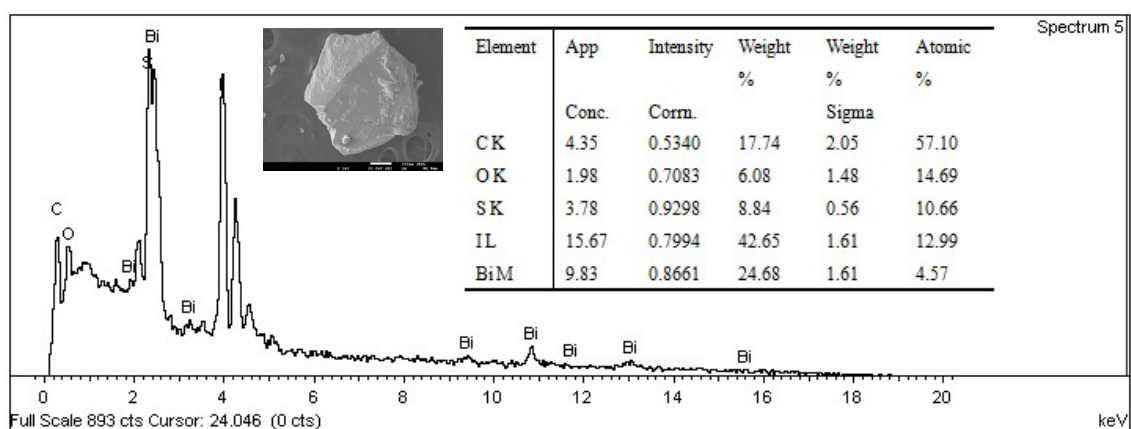

Fig. S3 The SEM images and EDS pattern of 2.

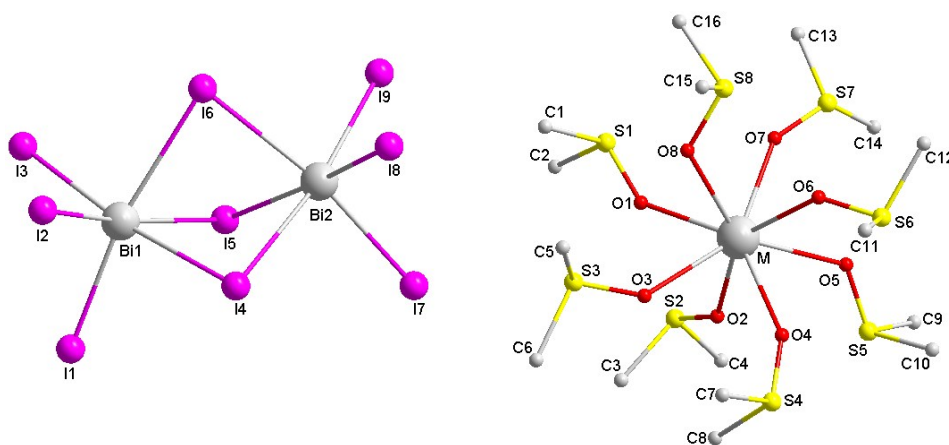

Fig. S4 The asymmetric unit of **1** and **2** (M = La (**1**), Bi (**2**)).

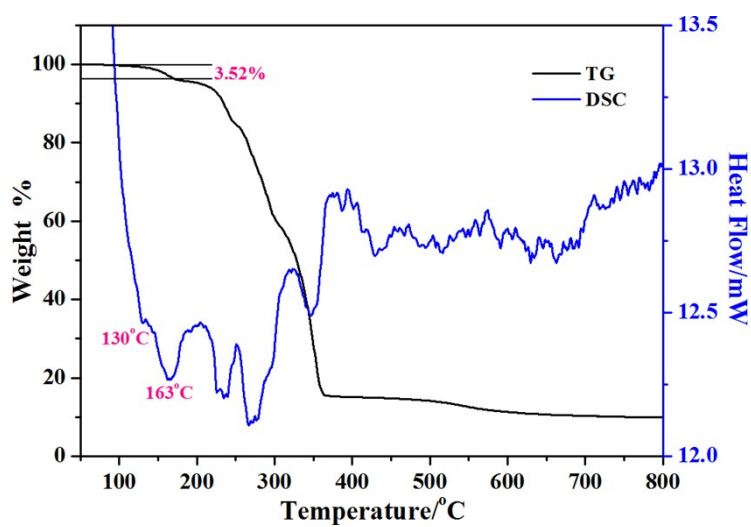

Fig. S5 TG-DSC curve of **1**.

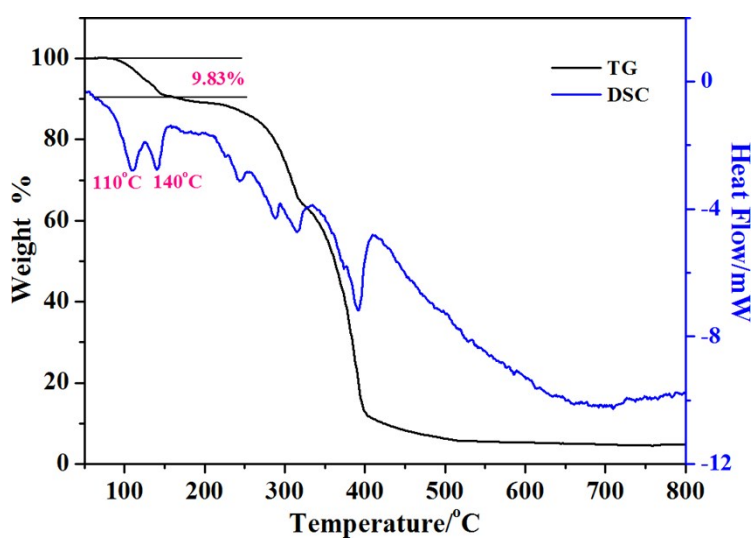

Fig. S6 TG-DSC curve of **2**.

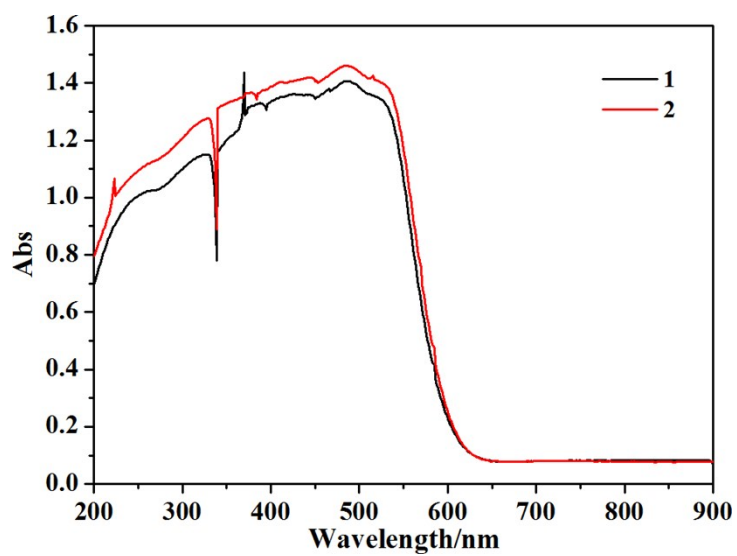

Fig. S7 The comparison of UV-vis absorption spectra for 1 and 2.

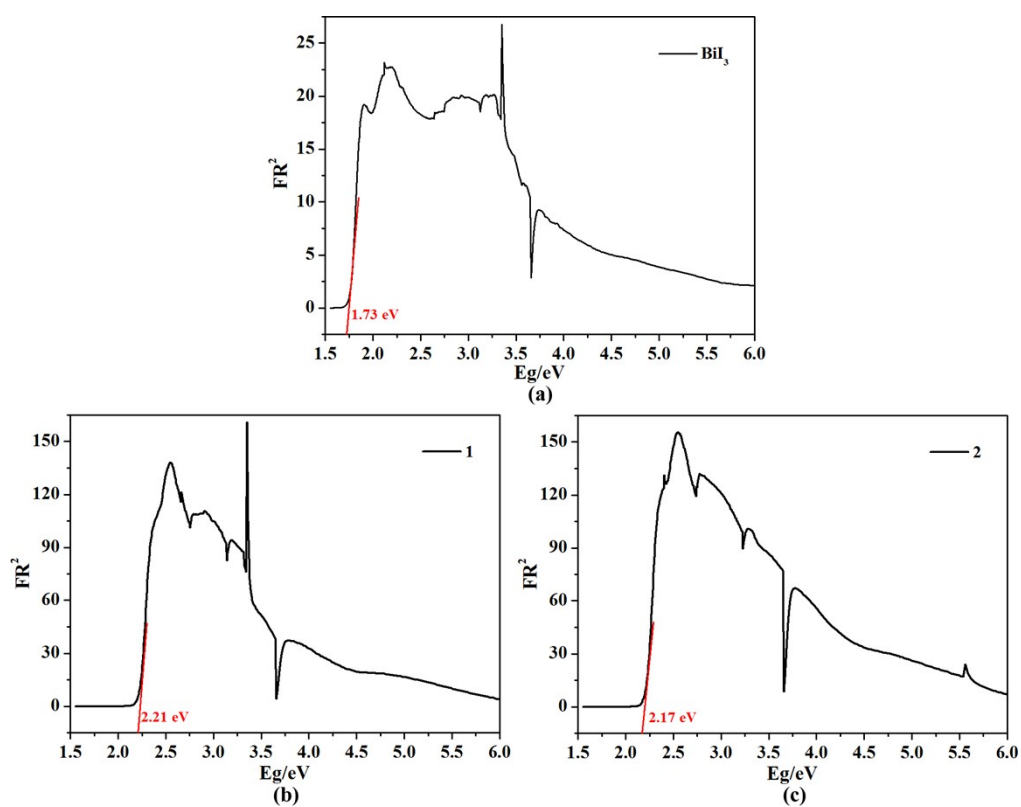

Fig. S8 The comparison of energy gaps for 1 and 2.

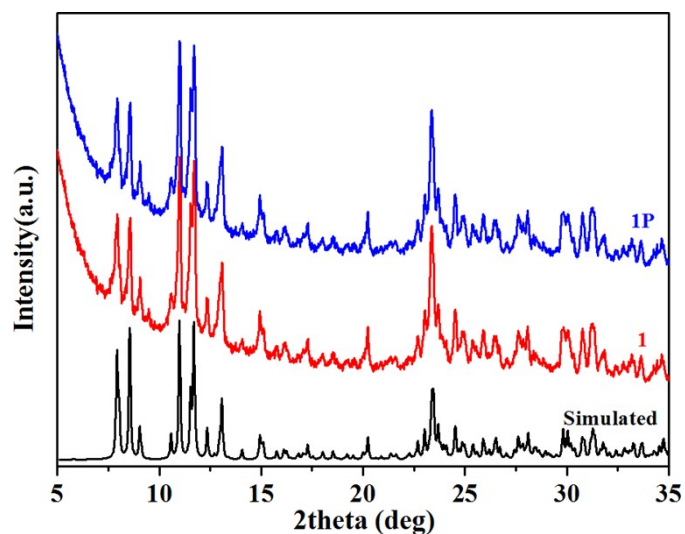

Fig. S9 UV-vis absorption spectra of **1** before and after light illumination.

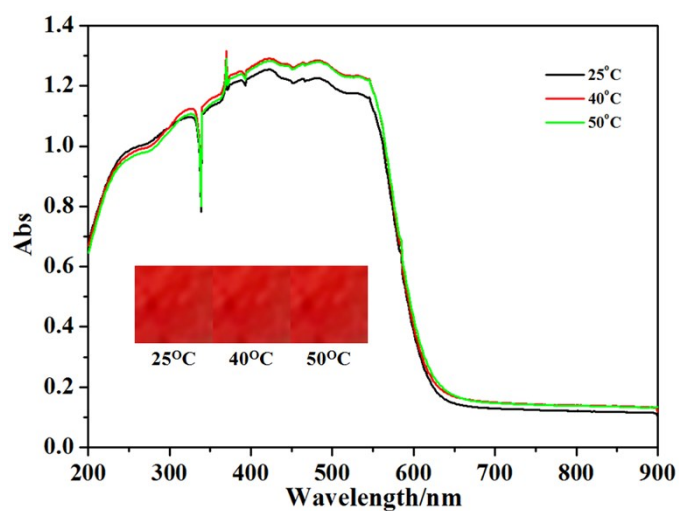

Fig. S10 Temperature-dependent UV-vis absorption spectra of **2** heated at the temperature range of 25-50°C for 15 min.

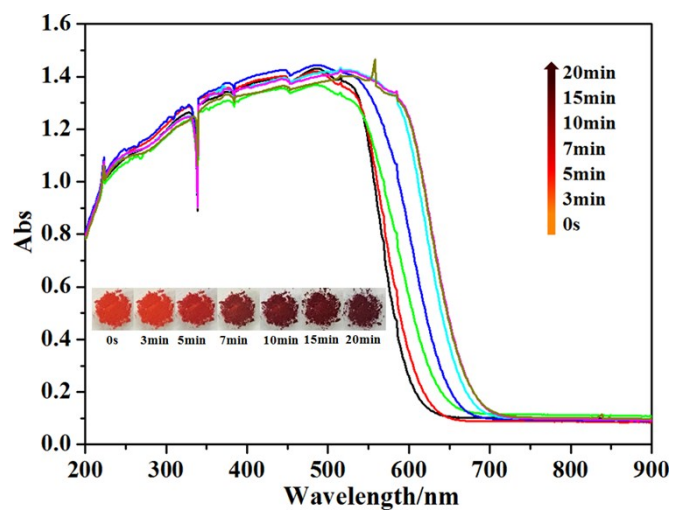

Fig. S11 Time-dependent UV-vis absorption spectra and photographs for the thermo-induced coloration process of **2**.

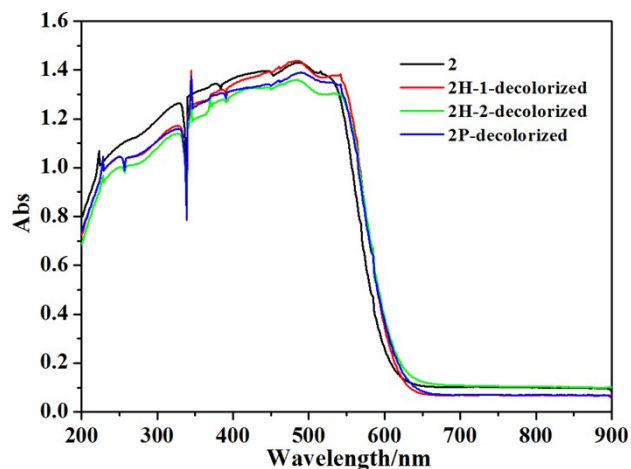

**Fig. S12** The comparison of UV-vis absorption spectra of **2**, **2H-1-decolorized**, **2H-2-decolorized** and **2P-decolorized**.

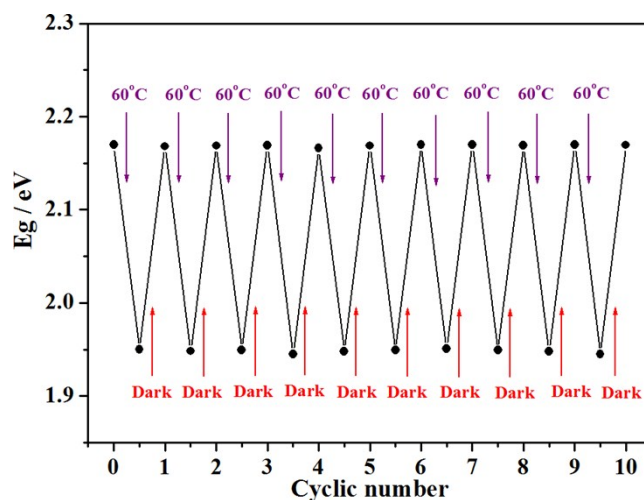

**Fig. S13** The switching cycles of coloration-decoloration processes of **2** upon alternating thermal (60°C) and dark treatment.

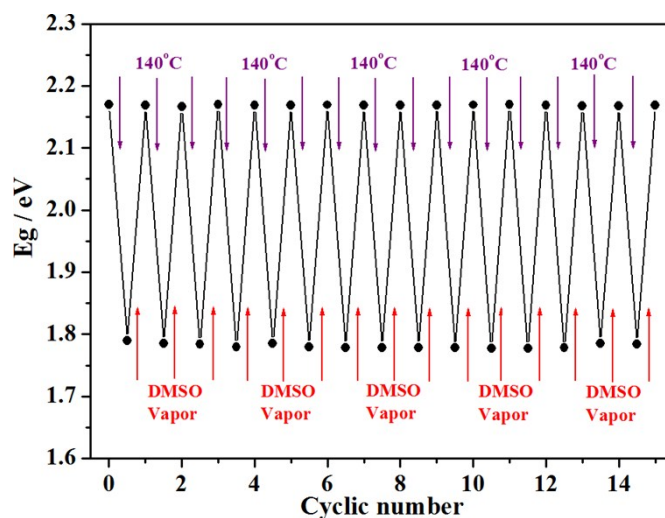

**Fig. S14** The switching cycles of coloration-decoloration processes of **2** upon alternating thermal treatment (140°C) and exposing in the DMSO vapor.

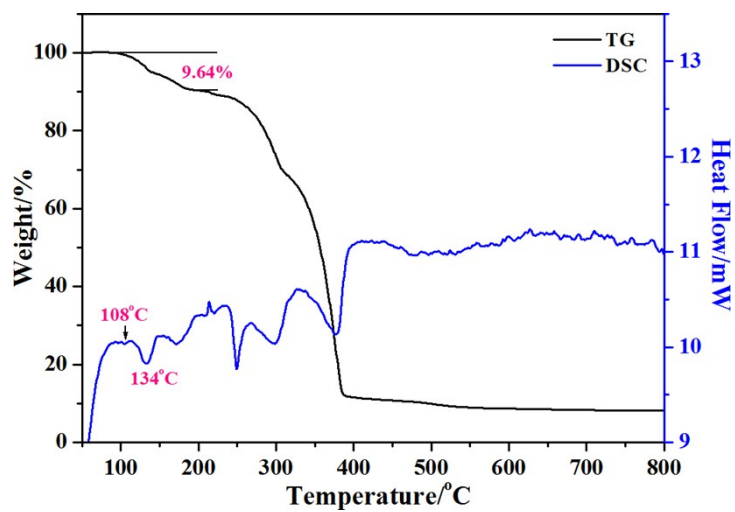

Fig. S15 TG-DSC curve of 2H-1.

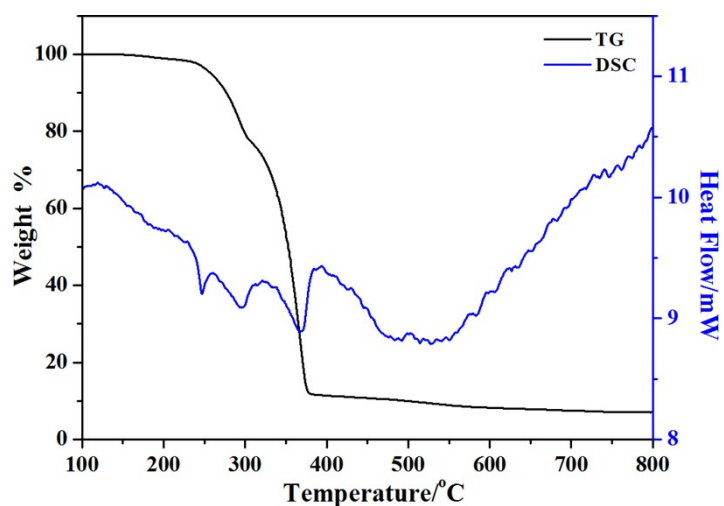

Fig. S16 TG-DSC curve of 2H-2.

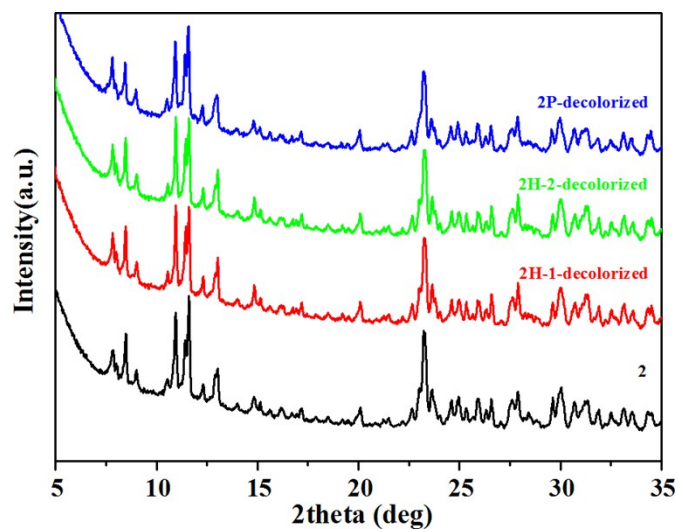

Fig. S17 The comparison of PXRD patterns of 2, 2H-1-decolorized, 2H-2-decolorized and 2P-decolorized.



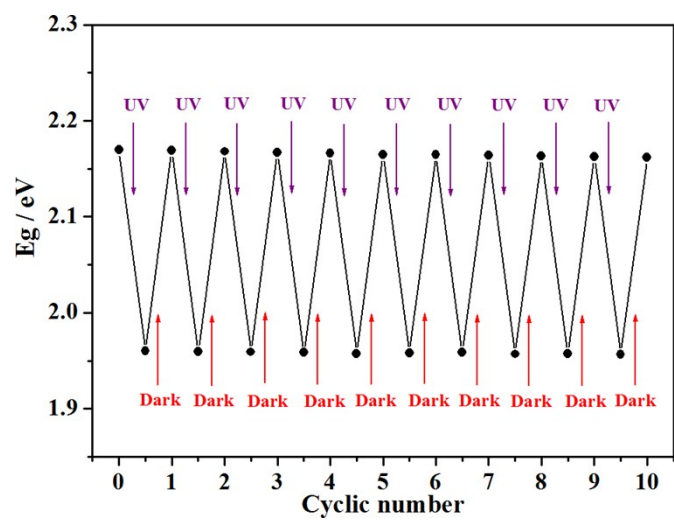

**Fig. S18** The switching cycles of coloration-decoloration processes of **2** upon UV light irradiation and dark treatment.

## 2. Tables

**Table S1** Crystallographic data and refinement parameters of compounds **1** and **2**.

| Compounds                                                                                    | <b>1</b>                                                                                       | <b>2</b>                                                                                     |
|----------------------------------------------------------------------------------------------|------------------------------------------------------------------------------------------------|----------------------------------------------------------------------------------------------|
| CCDC code                                                                                    | 1958253                                                                                        | 1958251                                                                                      |
| Temperature (K)                                                                              | 293(2)                                                                                         | 293(2)                                                                                       |
| Empirical formula                                                                            | C <sub>16</sub> H <sub>45</sub> O <sub>8</sub> S <sub>8</sub> LaBi <sub>2</sub> I <sub>9</sub> | C <sub>16</sub> H <sub>36</sub> O <sub>8</sub> S <sub>8</sub> Bi <sub>3</sub> I <sub>9</sub> |
| Formula weight                                                                               | 2320.97                                                                                        | 2381.97                                                                                      |
| Crystal size (mm)                                                                            | 0.122x0.07x0.028                                                                               | 0.18x0.14x0.09                                                                               |
| Crystal system                                                                               | Triclinic                                                                                      | Triclinic                                                                                    |
| Space group                                                                                  | <i>P</i> -1                                                                                    | <i>P</i> -1                                                                                  |
| <i>a</i> (Å)                                                                                 | 12.0219(14)                                                                                    | 11.958(3)                                                                                    |
| <i>b</i> (Å)                                                                                 | 15.8042(19)                                                                                    | 15.817(4)                                                                                    |
| <i>c</i> (Å)                                                                                 | 16.282(2)                                                                                      | 16.280(5)                                                                                    |
| $\alpha$ (°)                                                                                 | 82.124(3)                                                                                      | 82.222(6)                                                                                    |
| $\beta$ (°)                                                                                  | 69.973(3)                                                                                      | 69.979(6)                                                                                    |
| $\gamma$ (°)                                                                                 | 78.890(3)                                                                                      | 78.914(6)                                                                                    |
| <i>V</i> (Å <sup>3</sup> )                                                                   | 2843.5(6)                                                                                      | 2831.1(13)                                                                                   |
| <i>Z</i>                                                                                     | 2                                                                                              | 2                                                                                            |
| <i>D</i> <sub>c</sub> (g cm <sup>-3</sup> )                                                  | 2.711                                                                                          | 2.794                                                                                        |
| <i>F</i> (000)                                                                               | 2066                                                                                           | 2100                                                                                         |
| $\mu$ (mm <sup>-1</sup> )                                                                    | 12.119                                                                                         | 14.531                                                                                       |
| $\vartheta$ range (°)                                                                        | 2.51 to 28.36                                                                                  | 2.63 to 28.42                                                                                |
| Reflections collected                                                                        | 40936                                                                                          | 21701                                                                                        |
| Unique reflections                                                                           | 14207                                                                                          | 14222                                                                                        |
| <i>R</i> <sub>int</sub>                                                                      | 0.0624                                                                                         | 0.0834                                                                                       |
| Goodness-of-fit on <i>F</i> <sup>2</sup>                                                     | 1.059                                                                                          | 1.036                                                                                        |
| <i>R</i> <sub>1</sub> / <i>wR</i> <sub>2</sub> , [ <i>I</i> ≥ 2σ( <i>I</i> )] <sup>a,b</sup> | 0.0635/0.1663                                                                                  | 0.1541/0.3401                                                                                |
| <i>R</i> <sub>1</sub> / <i>wR</i> <sub>2</sub> , (all data)                                  | 0.1031/0.1928                                                                                  | 0.2368/0.3981                                                                                |
| $\Delta\rho_{\max}/\Delta\rho_{\min}$ (e Å <sup>-3</sup> )                                   | 3.395/-3.578                                                                                   | 5.872/-5.024                                                                                 |

**Table S2** Selected bond lengths (Å) and angles (°) for **1** and **2**.

| Compound 1      |            |                 |            |
|-----------------|------------|-----------------|------------|
| Bi(1)-I(1)      | 2.9144(11) | Bi(2)-I(8)      | 2.9369(12) |
| Bi(1)-I(2)      | 2.9459(10) | Bi(2)-I(9)      | 2.9951(10) |
| Bi(1)-I(3)      | 2.9493(13) | Bi(2)-I(7)      | 3.0104(12) |
| Bi(1)-I(5)      | 3.2002(10) | Bi(2)-I(6)      | 3.1386(11) |
| Bi(1)-I(4)      | 3.2345(11) | Bi(2)-I(4)      | 3.1895(10) |
| Bi(1)-I(6)      | 3.3072(11) | Bi(2)-I(5)      | 3.2577(11) |
| La(1)-O(7)      | 2.448(9)   | La(1)-O(2)      | 2.468(9)   |
| La(1)-O(1)      | 2.476(8)   | La(1)-O(6)      | 2.484(10)  |
| La(1)-O(8)      | 2.490(9)   | La(1)-O(5)      | 2.500(8)   |
| La(1)-O(4)      | 2.501(9)   | La(1)-O(3)      | 2.540(9)   |
|                 |            |                 |            |
| I(1)-Bi(1)-I(2) | 95.52(3)   | I(8)-Bi(2)-I(9) | 93.48(4)   |
| I(1)-Bi(1)-I(3) | 95.54(4)   | I(8)-Bi(2)-I(7) | 95.07(4)   |
| I(2)-Bi(1)-I(3) | 91.32(4)   | I(9)-Bi(2)-I(7) | 96.56(3)   |
| I(1)-Bi(1)-I(5) | 93.06(3)   | I(8)-Bi(2)-I(6) | 92.71(4)   |
| I(2)-Bi(1)-I(5) | 169.34(3)  | I(9)-Bi(2)-I(6) | 88.80(3)   |
| I(3)-Bi(1)-I(5) | 94.14(4)   | I(7)-Bi(2)-I(6) | 170.26(3)  |
| I(1)-Bi(1)-I(4) | 91.62(3)   | I(8)-Bi(2)-I(4) | 90.24(3)   |
| I(2)-Bi(1)-I(4) | 88.78(3)   | I(9)-Bi(2)-I(4) | 171.68(3)  |
| I(3)-Bi(1)-I(4) | 172.79(4)  | I(7)-Bi(2)-I(4) | 90.52(3)   |
| I(5)-Bi(1)-I(4) | 84.66(3)   | I(6)-Bi(2)-I(4) | 83.58(3)   |
| I(1)-Bi(1)-I(6) | 169.69(3)  | I(8)-Bi(2)-I(5) | 172.60(3)  |
| I(2)-Bi(1)-I(6) | 90.71(3)   | I(9)-Bi(2)-I(5) | 91.13(3)   |
| I(3)-Bi(1)-I(6) | 92.52(4)   | I(7)-Bi(2)-I(5) | 90.14(3)   |
| I(5)-Bi(1)-I(6) | 79.92(3)   | I(6)-Bi(2)-I(5) | 81.60(3)   |
| I(4)-Bi(1)-I(6) | 80.28(3)   | I(4)-Bi(2)-I(5) | 84.45(3)   |
|                 |            |                 |            |
| Compound 2      |            |                 |            |

---

|                 |            |                 |            |
|-----------------|------------|-----------------|------------|
| Bi(1)-I(3)      | 2.913(3)   | Bi(2)-I(8)      | 2.934(3)   |
| Bi(1)-I(2)      | 2.943(3)   | Bi(2)-I(9)      | 3.000(3)   |
| Bi(1)-I(1)      | 2.962(3)   | Bi(2)-I(7)      | 3.022(3)   |
| Bi(1)-I(5)      | 3.196(3)   | Bi(2)-I(6)      | 3.135(3)   |
| Bi(1)-I(4)      | 3.231(3)   | Bi(2)-I(4)      | 3.186(3)   |
| Bi(1)-I(6)      | 3.329(3)   | Bi(2)-I(5)      | 3.253(3)   |
| Bi(3)-O(7)      | 2.40(2)    | Bi(3)-O(3)      | 2.42(3)    |
| Bi(3)-O(8)      | 2.45(3)    | Bi(3)-O(1)      | 2.45(3)    |
| Bi(3)-O(6)      | 2.47(3)    | Bi(3)-O(5)      | 2.48(3)    |
| Bi(3)-O(4)      | 2.53(3)    | Bi(3)-O(2)      | 2.53(3)    |
|                 |            |                 |            |
| I(3)-Bi(1)-I(2) | 95.66(11)  | I(8)-Bi(2)-I(9) | 93.69(10)  |
| I(3)-Bi(1)-I(1) | 95.61(12)  | I(8)-Bi(2)-I(7) | 94.73(12)  |
| I(2)-Bi(1)-I(1) | 91.27(12)  | I(9)-Bi(2)-I(7) | 96.65(10)  |
| I(3)-Bi(1)-I(5) | 92.85(10)  | I(8)-Bi(2)-I(6) | 92.86(12)  |
| I(2)-Bi(1)-I(5) | 169.59(10) | I(9)-Bi(2)-I(6) | 88.43(9)   |
| I(1)-Bi(1)-I(5) | 93.88(11)  | I(7)-Bi(2)-I(6) | 170.58(9)  |
| I(3)-Bi(1)-I(4) | 91.60(9)   | I(8)-Bi(2)-I(4) | 90.09(10)  |
| I(2)-Bi(1)-I(4) | 89.02(10)  | I(9)-Bi(2)-I(4) | 171.55(8)  |
| I(1)-Bi(1)-I(4) | 172.73(11) | I(7)-Bi(2)-I(4) | 90.56(9)   |
| I(5)-Bi(1)-I(4) | 84.73(8)   | I(6)-Bi(2)-I(4) | 83.84(8)   |
| I(3)-Bi(1)-I(6) | 169.29(9)  | I(8)-Bi(2)-I(5) | 172.77(11) |
| I(2)-Bi(1)-I(6) | 91.02(10)  | I(9)-Bi(2)-I(5) | 91.02(9)   |
| I(1)-Bi(1)-I(6) | 92.60(11)  | I(7)-Bi(2)-I(5) | 90.17(9)   |
| I(5)-Bi(1)-I(6) | 79.72(8)   | I(6)-Bi(2)-I(5) | 81.78(9)   |
| I(4)-Bi(1)-I(6) | 80.13(8)   | I(4)-Bi(2)-I(5) | 84.53(8)   |

---

**Table S3** The relative stability of solvated metal cations in **1** and **2** based on DFT calculation.

|                       | La(DMSO) <sub>8</sub> <sup>3+</sup>                                        | La(DMSO) <sub>7</sub> <sup>3+</sup> | DMSO         |
|-----------------------|----------------------------------------------------------------------------|-------------------------------------|--------------|
| Energy (Hartree)      | -4454.6023118                                                              | -3901.5622148                       | -552.9660428 |
| $\Delta E$ (kcal/mol) | [(-4454.6023118)-(-3901.5622148)-(-552.9660428)]*627.5095 = -46.4697140149 |                                     |              |
|                       | Bi(DMSO) <sub>8</sub> <sup>3+</sup>                                        | Bi(DMSO) <sub>7</sub> <sup>3+</sup> | DMSO         |
| Energy (Hartree)      | -4428.679145                                                               | -3875.5981133                       | -553.0125036 |
| $\Delta E$ (kcal/mol) | [(-4428.679145)-(-3875.5981133)-(-553.0125036)]*627.5095 = -43.00203376695 |                                     |              |

**Table S4** The band gap (E<sub>g</sub>) of **2** with the decrease of I...I distance based on DFT calculation.

| I...I distance (Å) | LUMO (eV) | HOMO (eV) | E <sub>g</sub> (eV) |
|--------------------|-----------|-----------|---------------------|
| 3.78614            | 18.78973  | 16.70126  | 2.088473            |
| 3.73614            | 18.78783  | 16.70942  | 2.078405            |
| 3.68614            | 18.8164   | 16.79241  | 2.023982            |
| 3.63614            | 18.81395  | 16.80303  | 2.010921            |
| 3.58614            | 18.84306  | 16.8901   | 1.952961            |
| 3.53614            | 18.84878  | 16.9018   | 1.946974            |
| 3.48614            | 18.86973  | 16.99541  | 1.87432             |
| 3.43614            | 18.86674  | 17.01228  | 1.854456            |
| 3.38614            | 18.89667  | 17.10997  | 1.786699            |
| 3.33614            | 18.89313  | 17.13092  | 1.762209            |
| 3.28614            | 18.92361  | 17.23542  | 1.688194            |
| 3.23614            | 18.91953  | 17.26099  | 1.658534            |
| 3.18614            | 18.95082  | 17.37229  | 1.578532            |
| 3.13614            | 18.94592  | 17.40249  | 1.543429            |
| 3.08614            | 18.97858  | 17.52086  | 1.457714            |
| 3.03614            | 18.97286  | 17.55678  | 1.41608             |
